# Supplementary material for: Progression Rate From Intermediate to Advanced Age-Related Macular Degeneration Is Correlated With the Number of Risk Alleles at the CFH Locus
Source: PubMed Central journal article supplement — Invest Ophthalmol Vis Sci. 2016 Nov;57(14):6107–15. doi: 10.1167/iovs.16-19519 (PMC5104418; doi:10.1167/iovs.16-19519), 2016-11

## Supplementary Information

**Table S1.** Number of eyes (and individuals) with 0, 1 or 2 risk alleles at each of the 7 risk variants in analyses of progression to advanced AMD (GA or CNV), progression to GA only and progression to CNV only.

|                                   |              | Advanced AMD (GA or CNV) |              |              |            | GA           |                |              |            | CNV          |              |              |            |
|-----------------------------------|--------------|--------------------------|--------------|--------------|------------|--------------|----------------|--------------|------------|--------------|--------------|--------------|------------|
|                                   |              | Risk alleles             |              |              |            | Risk alleles |                |              |            | Risk alleles |              |              |            |
| Progressed?                       |              | 0                        | 1            | 2            | NA         | 0            | 1              | 2            | NA         | 0            | 1            | 2            | NA         |
| <b>ARMS2</b><br><b>rs10490924</b> | yes          | 70                       | 74           | 22           | -          | 34           | 28             | 9            | -          | 36           | 46           | 13           | -          |
|                                   | no           | 180                      | 146          | 55           | -          | 180          | 146            | 55           | -          | 180          | 146          | 54           | -          |
|                                   | <b>total</b> | <b>250</b>               | <b>220</b>   | <b>77</b>    | <b>-</b>   | <b>214</b>   | <b>174</b>     | <b>64</b>    | <b>-</b>   | <b>216</b>   | <b>192</b>   | <b>67</b>    | <b>-</b>   |
|                                   |              | <b>(169)</b>             | <b>(150)</b> | <b>(53)</b>  |            | <b>(145)</b> | <b>(121)</b>   | <b>(45)</b>  |            | <b>(151)</b> | <b>(133)</b> | <b>(46)</b>  |            |
| <b>CFH</b><br><b>rs10737680</b>   | yes          | 9                        | 42           | 116          | -          | 3            | 19             | 50           | -          | 6            | 23           | 66           | -          |
|                                   | no           | 22                       | 136          | 222          | -          | 22           | 136            | 222          | -          | 22           | 136          | 222          | -          |
|                                   | <b>total</b> | <b>31</b>                | <b>178</b>   | <b>338</b>   | <b>-</b>   | <b>25</b>    | <b>155</b>     | <b>272</b>   | <b>-</b>   | <b>28</b>    | <b>159</b>   | <b>288</b>   | <b>-</b>   |
|                                   |              | <b>(20)</b>              | <b>(123)</b> | <b>(229)</b> |            | <b>(18)</b>  | <b>(107)</b>   | <b>(186)</b> |            | <b>(19)</b>  | <b>(112)</b> | <b>(199)</b> |            |
| <b>CFH</b><br><b>rs1061170</b>    | yes          | 30                       | 77           | 58           | 2          | 14           | 31             | 25           | 2          | 16           | 46           | 33           | <b>0</b>   |
|                                   | no           | 78                       | 179          | 121          | 2          | 78           | 179            | 121          | 2          | 78           | 179          | 121          | <b>2</b>   |
|                                   | <b>total</b> | <b>108</b>               | <b>256</b>   | <b>179</b>   | <b>4</b>   | <b>92</b>    | <b>210</b>     | <b>146</b>   | <b>4</b>   | <b>94</b>    | <b>225</b>   | <b>154</b>   | <b>2</b>   |
|                                   |              | <b>(75)</b>              | <b>(173)</b> | <b>(121)</b> | <b>(3)</b> | <b>(68)</b>  | <b>(142)</b>   | <b>(99)</b>  | <b>(3)</b> | <b>(68)</b>  | <b>(154)</b> | <b>(106)</b> | <b>(2)</b> |
| <b>C2</b><br><b>rs429608</b>      | yes          | 2                        | 20           | 145          | -          | 0            | 12             | 60           | -          | 2            | 8            | 85           | -          |
|                                   | no           | 4                        | 56           | 320          | -          | 4            | 56             | 320          | -          | 4            | 56           | 320          | -          |
|                                   | <b>total</b> | <b>6</b>                 | <b>76</b>    | <b>465</b>   | <b>-</b>   | <b>4</b>     | <b>68</b>      | <b>380</b>   | <b>-</b>   | <b>6</b>     | <b>64</b>    | <b>405</b>   | <b>-</b>   |
|                                   |              | <b>(4)</b>               | <b>(52)</b>  | <b>(316)</b> |            | <b>(3)</b>   | <b>(45)</b>    | <b>(263)</b> |            | <b>(4)</b>   | <b>(46)</b>  | <b>(280)</b> |            |
| <b>C2</b><br><b>rs9332739</b>     | yes          | 1                        | 3            | 161          | 2          | -            | 2              | 68           | 2          | 1            | 1            | 93           | 0          |
|                                   | no           | 0                        | 18           | 360          | 2          | -            | 18             | 360          | 2          | 0            | 18           | 360          | 2          |
|                                   | <b>total</b> | <b>1</b>                 | <b>21</b>    | <b>521</b>   | <b>4</b>   | <b>-</b>     | <b>20 (13)</b> | <b>428</b>   | <b>4</b>   | <b>1</b>     | <b>19</b>    | <b>453</b>   | <b>2</b>   |
|                                   |              | <b>(1)</b>               | <b>(13)</b>  | <b>(355)</b> | <b>(3)</b> |              | <b>(295)</b>   | <b>(3)</b>   | <b>(1)</b> | <b>(12)</b>  | <b>(315)</b> | <b>(2)</b>   |            |
| <b>CFB</b><br><b>rs641153</b>     | yes          | 0                        | 16           | 149          | 2          | 0            | 5              | 65           | 2          | 0            | 11           | 84           | 0          |
|                                   | no           | 1                        | 27           | 350          | 2          | 1            | 27             | 350          | 2          | 1            | 27           | 350          | 2          |
|                                   | <b>total</b> | <b>1</b>                 | <b>43</b>    | <b>499</b>   | <b>4</b>   | <b>1</b>     | <b>32</b>      | <b>415</b>   | <b>4</b>   | <b>1</b>     | <b>38</b>    | <b>434</b>   | <b>2</b>   |
|                                   |              | <b>(1)</b>               | <b>(31)</b>  | <b>(337)</b> | <b>(3)</b> | <b>(1)</b>   | <b>(22)</b>    | <b>(285)</b> | <b>(3)</b> | <b>(1)</b>   | <b>(28)</b>  | <b>(299)</b> | <b>(2)</b> |
| <b>C3</b><br><b>rs2230199</b>     | yes          | 84                       | 70           | 13           | -          | 32           | 34             | 6            | -          | 52           | 36           | 7            | -          |
|                                   | no           | 218                      | 130          | 32           | -          | 218          | 130            | 32           | -          | 218          | 130          | 32           | -          |
|                                   | <b>total</b> | <b>302</b>               | <b>200</b>   | <b>45</b>    | <b>-</b>   | <b>250</b>   | <b>164</b>     | <b>38</b>    | <b>-</b>   | <b>270</b>   | <b>166</b>   | <b>39</b>    | <b>-</b>   |
|                                   |              | <b>(207)</b>             | <b>(135)</b> | <b>(30)</b>  |            | <b>(172)</b> | <b>(114)</b>   | <b>(25)</b>  |            | <b>(189)</b> | <b>(115)</b> | <b>(26)</b>  |            |

**Table S2.** Multivariate regression coefficients and hazard ratios (HR) from Cox proportional hazards models testing whether progression rate from intermediate to advanced (grades 4 or 5) varied with genotype at 7 variants associated with risk of advanced AMD after controlling for variation due to age and sex. Contrasts from the intercept (females with 0 risk alleles) are reported. Significant variables are shown in bold. Models were relevelled to give contrasts between 2 and 1 risk alleles (shown in italic).

| variable                             | coef         | se (coef)   | HR (95% CI)             | p-value          |
|--------------------------------------|--------------|-------------|-------------------------|------------------|
| <b>Age</b>                           | <b>0.05</b>  | <b>0.01</b> | <b>1.05 (1.03-1.08)</b> | <b>&lt;0.001</b> |
| Sex (M)                              | 0.03         | 0.17        | 1.03 (0.71-1.50)        | 0.878            |
| ARMS2: rs10490924 (GT)               | 0.22         | 0.18        | 1.24 (0.85-1.81)        | 0.254            |
| ARMS2: rs10490924 (TT)               | 0.06         | 0.27        | 1.06 (0.55-2.05)        | 0.870            |
| <i>ARMS2: rs10490924 (TT vs. GT)</i> | <i>-0.16</i> | <i>0.27</i> | <i>0.85 (0.43-1.66)</i> | <i>0.632</i>     |
| CFH: rs10737680 (CA)                 | -0.81        | 0.43        | 0.45 (0.16-1.26)        | 0.128            |
| CFH: rs10737680 (AA)                 | -0.27        | 0.42        | 0.77 (0.27-2.18)        | 0.618            |
| <b>CFH: rs10737680 (AA vs. CA)</b>   | <b>0.54</b>  | <b>0.22</b> | <b>1.72 (1.06-2.79)</b> | <b>0.029</b>     |
| CFH: rs1061170 (TC)                  | 0.26         | 0.25        | 1.30 (0.75-2.26)        | 0.347            |
| CFH: rs1061170 (CC)                  | -0.10        | 0.28        | 1.10 (0.60-2.02)        | 0.755            |
| <i>CFH: rs1061170 (CC vs. TC)</i>    | <i>-0.17</i> | <i>0.20</i> | <i>0.84 (0.55-1.29)</i> | <i>0.436</i>     |
| C2: rs429608 (GG)                    | 0.39         | 0.46        | 1.48 (0.70-3.11)        | 0.307            |
| C2: rs9332739 (GG)                   | 0.15         | 0.66        | 1.17 (0.42-3.26)        | 0.768            |
| CFB: rs641153 (GG)                   | -0.75        | 0.49        | 0.47 (0.20-1.10)        | 0.082            |
| C3: rs2230199 (GC)                   | 0.02         | 0.17        | 1.02 (0.70-1.49)        | 0.916            |
| C3: rs2230199 (CC)                   | -0.30        | 0.31        | 0.74 (0.36-1.52)        | 0.401            |
| <i>C3: rs2230199 (CC vs. GC)</i>     | <i>-0.32</i> | <i>0.32</i> | <i>0.73 (0.35-1.53)</i> | <i>0.400</i>     |

### Supplementary Figure 1 Survival curves for progression to advanced AMD (GA or CNV)

Survival curves showing the predicted progression rate from intermediate (grade 3) to advanced (grades 4 or 5) AMD with respect to the number of risk alleles at a) *ARMS2*:rs10490924, b) *CFH*:rs1061170, c) *C2*:rs429608, d) *C2*:rs9332739, e) *CFB*:rs641153, and f) *C3*:rs2230199 for females of 67 years of age.

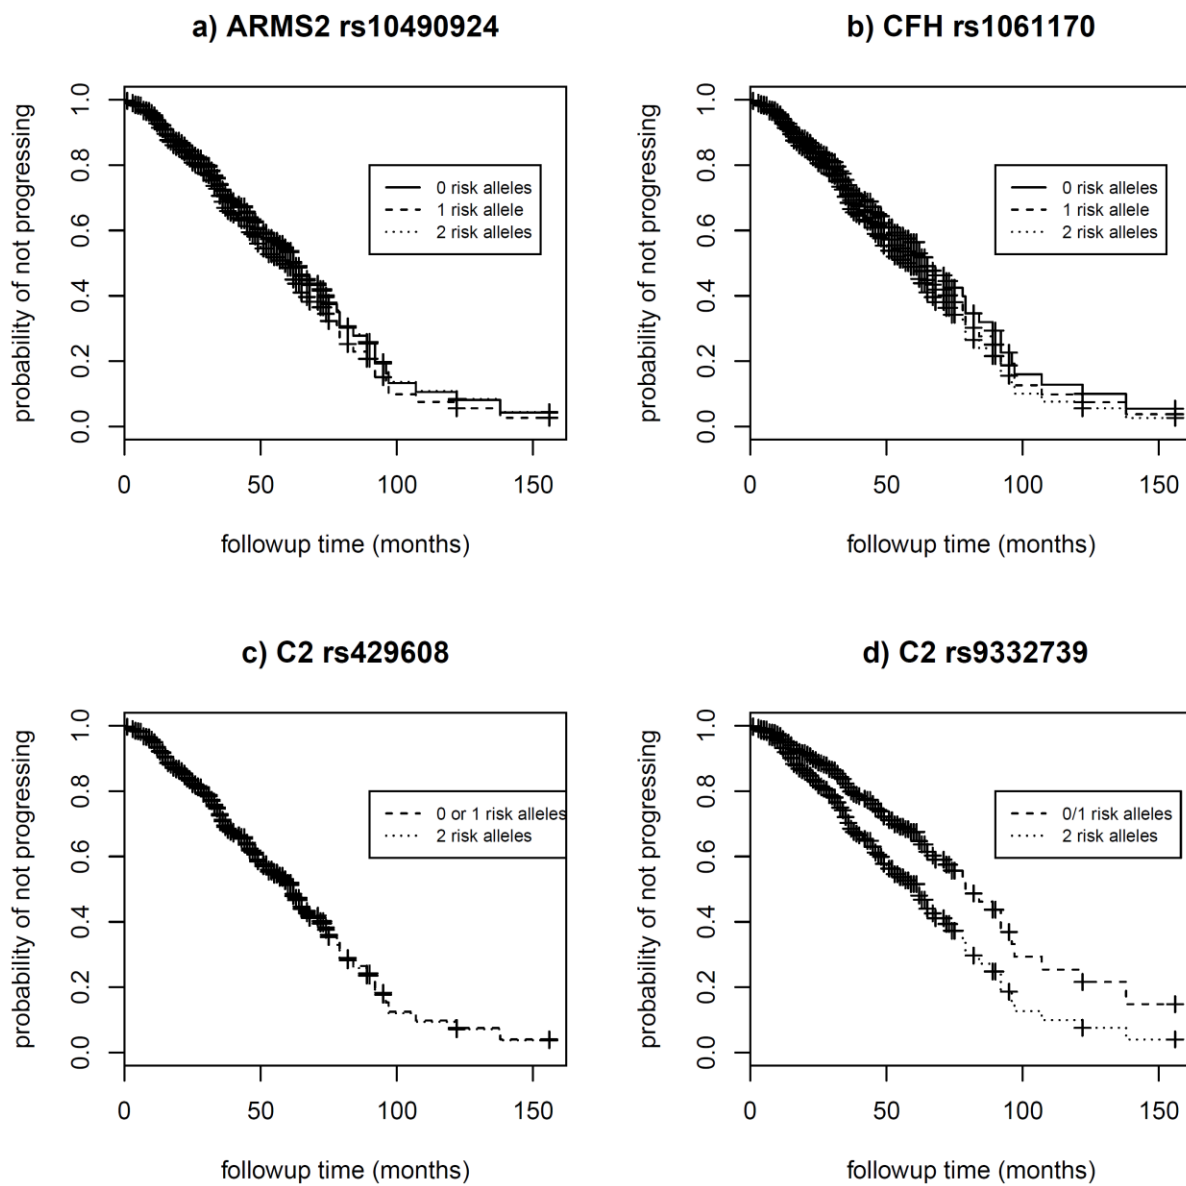

e) C2 rs641153

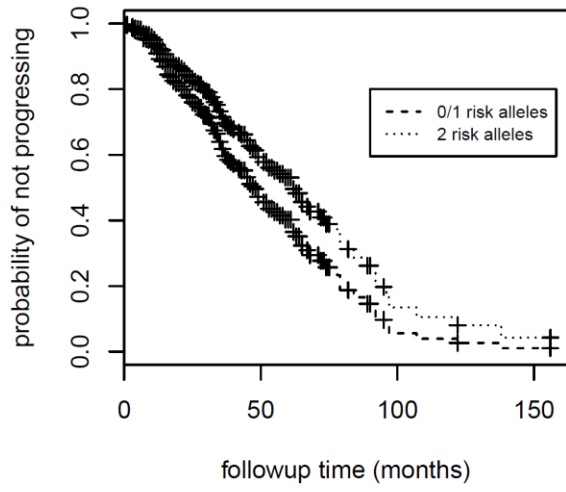

f) C3 rs2230199

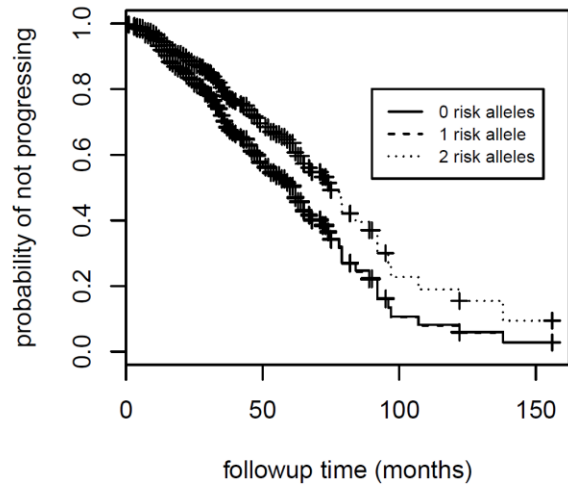

Supplement: iovs-57-13-61_s01.pdf [file iovs-57-13-61_s01.pdf]
